# Supplementary material
Source: PubMed Central journal article supplement (PMC3985413)
Supplement: NIHMS231665-supplement-supplement_1.pdf [file NIHMS231665-supplement-supplement_1.pdf]

## Supplementary Material

**Table S1. Demographic, Cognitive, PCL-R, and Substance Use data for N = 72 sample**

| <b>Demographic</b>           | <b>Mean (SD)*</b> |
|------------------------------|-------------------|
| Age                          | 32.4 (9.53)       |
| Ethnicity                    |                   |
| <i>Caucasian</i>             | N = 29            |
| <i>Non-Caucasian</i>         | N = 43            |
| Handedness Score‡            | 55.3 (47.7)       |
| <b>Cognitive</b>             |                   |
| IQ                           | 98.5 (14.29)      |
| <b>Psychopathy</b>           |                   |
| PCL-R Total                  | 19.3 (7.07)       |
| Factor 1                     | 6.2 (3.52)        |
| Factor 2                     | 11.4 (4.07)       |
| <b>Substance Use (Past)§</b> |                   |
| <i>Total Years used</i>      |                   |
| Alcohol                      | 10.4 (9.28)       |
| Cannabis                     | 10.8 (9.08)       |
| Cocaine                      | 3.5 (6.58)        |
| Methamphetamine              | 2.8 (4.43)        |
| Heroin                       | 0.9 (3.23)        |
| Hallucinogens                | 1.3 (3.22)        |

\* Unless otherwise noted.

‡ Information was not available for one psychopathic participant.

§ Information was not available for two psychopathic participants.

**Figure S1.** Negative correlation between PCL-R scores and ventromedial prefrontal activity during A) Moral vs. Non-moral picture viewing ( $x = 9, y = 39, z = -12; t = 3.44, p = .035$  FWE corrected) and B) Moral vs. Neutral picture viewing ( $x = 12, y = 39, z = -9; t = 3.36, p = .044$  FWE corrected) in  $N = 72$  participants. For these participants, correlations between PCL-R scores and demographic variables were as follows: Age:  $r = -0.06$ , IQ:  $r = 0.14$ , Handedness:  $r = 0.09$ ; Alcohol use:  $r = -0.03$ , Heroin use:  $r = 0.06$ , Cocaine use:  $r = 0.17$ , Methamphetamine use:  $r = 0.18$ , Cannabis use:  $r = -0.05$ , Hallucinogen use:  $r = 0.15$ . None of these correlations were significant. Regarding race, 85% of our 72 participants were either Caucasian (48%) or Hispanic (52%). These two groups did not significantly differ in PCL-R score ( $p = .82$ ). Because none of these variables were significantly associated with PCL-R scores, we did not include any of them as covariates.

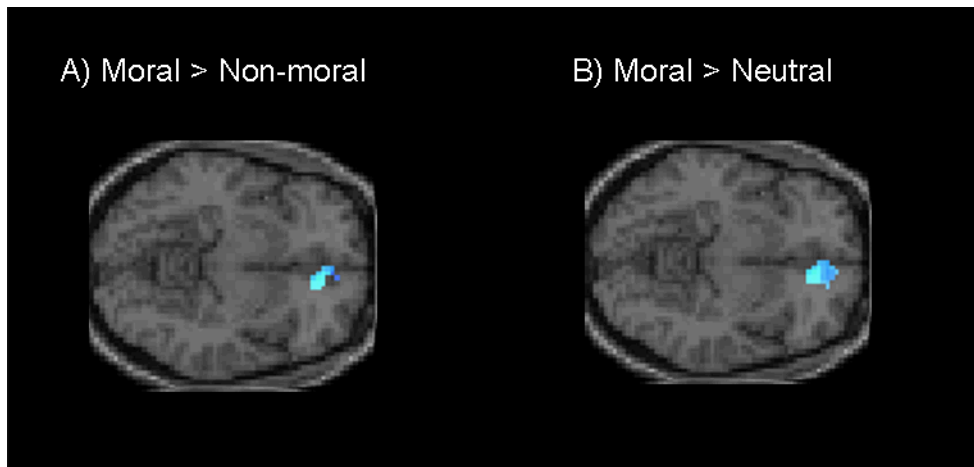

**Figure S2.** fMRI results of moral vs. non-moral picture viewing from non-antisocial/non-incarcerated participants (N = 28, Harenski et al., 2008), and the current sample of nonpsychopaths (N = 16) and psychopaths (N = 16), illustrating the similarity in activation patterns between non-incarcerated participants and nonpsychopaths.

**Non-incarcerated****Nonpsychopaths****Psychopaths**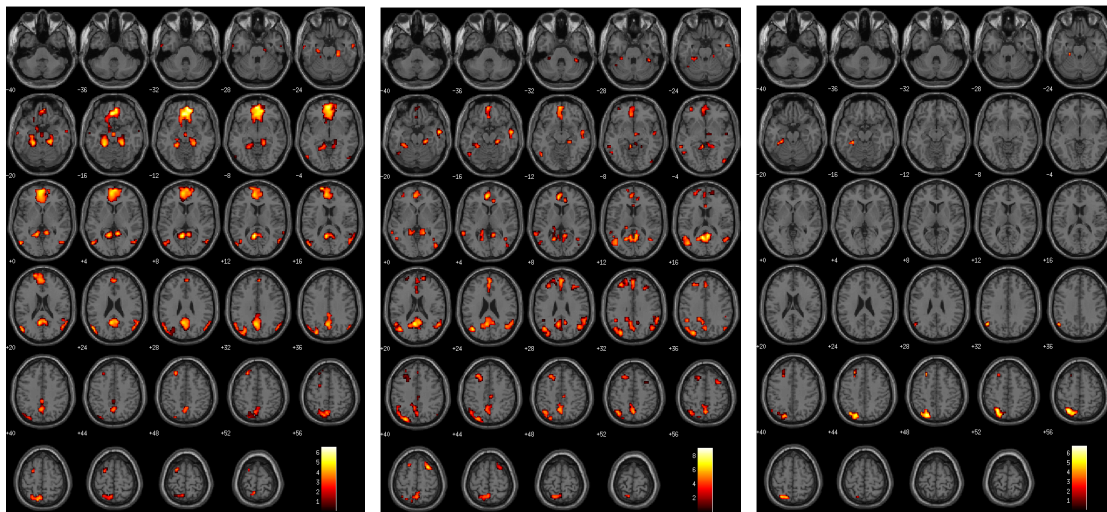

**Optional Supplementary Material** (can be included at discretion of editor)

**Table S2. Negative correlations between Factor/Facet scores and brain activity in regions of interest**

| <b>Contrast</b>             | <b>Factor/Facet</b>                |              | <b>MPFC</b> | <b>Amyg (R)</b> | <b>Amyg (L)</b> | <b>ATC (R)</b> | <b>ATC (L)</b> | <b>PTC (R)</b> | <b>PTC (L)</b> |     |
|-----------------------------|------------------------------------|--------------|-------------|-----------------|-----------------|----------------|----------------|----------------|----------------|-----|
| <i>Moral &gt; Non-moral</i> | Factor 1 (Interpersonal/Affective) | <i>t</i>     | ---         | 2.29            | 2.17            | 1.7            | ---            | ---            | 2.27           |     |
|                             |                                    | <i>p</i>     | ---         | 0.32            | 0.36            | 0.56           | ---            | ---            | 0.32           |     |
|                             |                                    | <i>k</i>     | ---         | 42              | 12              | 1              | ---            | ---            | 5              |     |
|                             |                                    | <i>x,y,z</i> | ---         | 30,-6,-24       | -24,-9,-33      | 60,-6,-12      | ---            | ---            | -51,-63,24     |     |
|                             | Factor 2 (Impulsive/Antisocial)    |              |             | 3.83            | 2.14            | 2.1            | 2.96           | ---            | 2.55           | --- |
|                             |                                    |              |             | 0.01***         | 0.38            | 0.39           | 0.1            | ---            | 0.22           | --- |
|                             |                                    |              |             | 26              | 5               | 3              | 25             | ---            | 33             | --- |
|                             |                                    |              |             | 9,36,-9         | 24,-9,-21       | -27,-6,-24     | 57,-9,-18      | ---            | 45,-66,33      | --- |
|                             | Facet 1 (Interpersonal)            |              |             | ---             | ---             | ---            | ---            | ---            | ---            | --- |
|                             |                                    |              |             | ---             | ---             | ---            | ---            | ---            | ---            | --- |
|                             |                                    |              |             | ---             | ---             | ---            | ---            | ---            | ---            | --- |
|                             |                                    |              |             | ---             | ---             | ---            | ---            | ---            | ---            | --- |
|                             | Facet 2 (Affective)                |              |             | ---             | ---             | 2.85           | 2.84           | ---            | ---            | --- |
|                             |                                    |              |             | ---             | ---             | 0.13           | 0.13           | ---            | ---            | --- |
|                             |                                    |              |             | ---             | ---             | 13             | 11             | ---            | ---            | --- |
|                             |                                    |              |             | ---             | ---             | -18,-12,-30    | 57,3,-21       | ---            | ---            | --- |
| Facet 3 (Impulsive)         |                                    |              | 1.69        | 2.62            | ---             | ---            | ---            | ---            | ---            |     |
|                             |                                    |              | 0.56        | 0.2             | ---             | ---            | ---            | ---            | ---            |     |
|                             |                                    |              | 1           | 11              | ---             | ---            | ---            | ---            | ---            |     |
|                             |                                    |              | 12,51,-6    | 36,0,-27        | ---             | ---            | ---            | ---            | ---            |     |
| Facet 4 (Antisocial)        |                                    |              | ---         | 2.13            | ---             | ---            | ---            | ---            | ---            |     |
|                             |                                    |              | ---         | 0.38            | ---             | ---            | ---            | ---            | ---            |     |
|                             |                                    |              | ---         | 3               | ---             | ---            | ---            | ---            | ---            |     |
|                             |                                    |              | ---         | 39,-6,-27       | ---             | ---            | ---            | ---            | ---            |     |
| <i>Moral &gt; Neutral</i>   | Factor 1 (Interpersonal/Affective) |              | ---         | 3.31            | 1.92            | ---            | ---            | ---            | 2.01           |     |
|                             |                                    |              | ---         | 0.05***         | 0.47            | ---            | ---            | ---            | 0.42           |     |
|                             |                                    |              | ---         | 63              | 4               | ---            | ---            | ---            | 12             |     |
|                             |                                    |              | ---         | 33,-6,-24       | -27,-3,-21      | ---            | ---            | ---            | -48,-63,24     |     |
|                             | Factor 2 (Impulsive/Antisocial)    |              |             | 2.5             | ---             | ---            | 1.7            | ---            | 2.05           | --- |
|                             |                                    |              |             | 0.23            | ---             | ---            | 0.54           | ---            | 0.4            | --- |
|                             |                                    |              |             | 61              | ---             | ---            | 2              | ---            | 8              | --- |
|                             |                                    |              |             | 15, 42, -9      | ---             | ---            | 57,-9,-21      | ---            | 45,-66 36      | --- |

|                              |                                    |          |            |            |           |             |            |            |
|------------------------------|------------------------------------|----------|------------|------------|-----------|-------------|------------|------------|
|                              | Facet 1 (Interpersonal)            | ---      | ---        | ---        | ---       | ---         | ---        | ---        |
|                              |                                    | ---      | ---        | ---        | ---       | ---         | ---        | ---        |
|                              |                                    | ---      | ---        | ---        | ---       | ---         | ---        | ---        |
|                              |                                    | ---      | ---        | ---        | ---       | ---         | ---        | ---        |
|                              | Facet 2 (Affective)                | ---      | ---        | 2.53       | ---       | ---         | ---        | ---        |
|                              |                                    | ---      | ---        | 0.22       | ---       | ---         | ---        | ---        |
|                              |                                    | ---      | ---        | 5          | ---       | ---         | ---        | ---        |
|                              |                                    | ---      | ---        | -21,6,-24  | ---       | ---         | ---        | ---        |
|                              | Facet 3 (Impulsive)                | 2.34     | 2.37       | 1.74       | 2.34      | 1.8         | 2.78       | ---        |
|                              |                                    | 0.28     | 0.27       | 0.52       | 0.28      | 0.5         | 0.14       | ---        |
|                              |                                    | 20       | 15         | 1          | 10        | 2           | 16         | ---        |
|                              |                                    | 15,51,-6 | 36,-6,-21  | -30,0,-24  | 57,-9,-24 | -60,-9,-21  | -51,-63,30 | ---        |
|                              | Facet 4 (Antisocial)               | ---      | ---        | ---        | ---       | ---         | ---        | ---        |
|                              |                                    | ---      | ---        | ---        | ---       | ---         | ---        | ---        |
|                              |                                    | ---      | ---        | ---        | ---       | ---         | ---        | ---        |
|                              |                                    | ---      | ---        | ---        | ---       | ---         | ---        | ---        |
| <i>Parametric modulation</i> | Factor 1 (Interpersonal/Affective) | ---      | 2.43       | ---        | ---       | ---         | 1.9        | ---        |
|                              |                                    | ---      | 0.32       | ---        | ---       | ---         | 0.56       | ---        |
|                              |                                    | ---      | 10         | ---        | ---       | ---         | 6          | ---        |
|                              |                                    | ---      | 33,-15,-24 | ---        | ---       | ---         | 51,-57,30  | ---        |
|                              | Factor 2 (Impulsive/Antisocial)    | 1.74     | 2.78       | ---        | ---       | ---         | ---        | ---        |
|                              |                                    | 0.62     | 0.19       | ---        | ---       | ---         | ---        | ---        |
|                              |                                    | 1        | 6          | ---        | ---       | ---         | ---        | ---        |
|                              |                                    | 15,42,-3 | 24,0,-27   | ---        | ---       | ---         | ---        | ---        |
|                              | Facet 1 (Interpersonal)            | ---      | ---        | ---        | ---       | ---         | ---        | ---        |
|                              |                                    | ---      | ---        | ---        | ---       | ---         | ---        | ---        |
|                              |                                    | ---      | ---        | ---        | ---       | ---         | ---        | ---        |
|                              |                                    | ---      | ---        | ---        | ---       | ---         | ---        | ---        |
|                              | Facet 2 (Affective)                | 2.99     | 3.79       | 3.25       | 3.9       | 2.61        | 1.93       | 2.31       |
|                              |                                    | 0.12     | 0.02***    | 0.07       | 0.01      | 0.17        | 0.53       | 0.36       |
|                              |                                    | 26       | 62         | 54         | 32        | 15          | 1          | 10         |
|                              |                                    | 9,48,-3  | 33,-9,-30  | -30,0,-27  | 63,-9,-18 | -54,-18,-24 | 51,-72,27  | -51,-66,30 |
|                              | Facet 3 (Impulsive)                | 2.27     | 2.81       | 2.46       | ---       | 1.7         | 2.02       | ---        |
|                              |                                    | 0.38     | 0.17       | 0.29       | ---       | 0.62        | 0.49       | ---        |
|                              |                                    | 5        | 50         | 10         | ---       | 1           | 5          | ---        |
|                              |                                    | 9,42,-9  | 33,-15,-27 | -15,-9,-24 | ---       | -60,-21,-21 | 48,-69,30  | ---        |
|                              | Facet 4 (Antisocial)               | 2.05     | ---        | ---        | ---       | ---         | ---        | ---        |
|                              |                                    | 0.48     | ---        | ---        | ---       | ---         | ---        | ---        |
|                              |                                    | 6        | ---        | ---        | ---       | ---         | ---        | ---        |

15, 42, -3    ---    ---    ---    ---    ---    ---

---

MPFC = medial prefrontal cortex; Amyg = amygdala, ATC = anterior temporal cortex, PTC = posterior temporal cortex. t = t value, p = p value, k = cluster size (voxels). Dashes indicate no activity within ROI.
